# Supplementary material for: Unsupervised deep learning of electrocardiograms enables scalable human disease profiling
Source: PubMed Central journal article supplement — NPJ Digit Med. 2025 Jan 12;8:23. doi: 10.1038/s41746-024-01418-9 (PMC11724961; doi:10.1038/s41746-024-01418-9), 2025-01-12
Supplement: 41746_2024_1418_MOESM1_ESM.pdf [file 41746_2024_1418_MOESM1_ESM.pdf]

# Unsupervised Deep Learning of Electrocardiograms Enables Scalable Human Disease Profiling

## Supplementary Materials

### Table of Contents

|                                                                                                                                                                                               |    |
|-----------------------------------------------------------------------------------------------------------------------------------------------------------------------------------------------|----|
| <b>Supplementary Figure 1.</b> General autoencoder schematic. ....                                                                                                                            | 1  |
| <b>Supplementary Figure 2.</b> Autoencoder architecture. ....                                                                                                                                 | 2  |
| <b>Supplementary Figure 3.</b> Example of median waveforms generated from an original 12-lead electrocardiogram. ....                                                                         | 3  |
| <b>Supplementary Figure 4.</b> Latent space representations of age, sex, and body mass index. ....                                                                                            | 4  |
| <b>Supplementary Figure 5.</b> Cluster centroids and phenotype vector derivation. ....                                                                                                        | 5  |
| <b>Supplementary Figure 6.</b> Latent space 12-lead electrocardiogram phenome-wide association study perturbation tests. ....                                                                 | 6  |
| <b>Supplementary Figure 7.</b> Forest plots demonstrating associations for the top 3 phecodes in each of the datasets for both 12-lead and single-lead ECG latent space PheWAS analyses. .... | 7  |
| <b>Supplementary Figure 8.</b> Improvements in Phecode discrimination using ECG vector component scores. ....                                                                                 | 8  |
| <b>Supplementary Figure 9.</b> Phenotype vector correlation matrix. ....                                                                                                                      | 9  |
| <b>Supplementary Figure 10.</b> Vector component score illustration. ....                                                                                                                     | 10 |
| <b>Supplementary Tables 1-10.</b> ....                                                                                                                                                        | 11 |
| <b>Supplementary Table 11.</b> Top associations by effect size across disease category for incident disease. ....                                                                             | 12 |
| <b>Supplementary Tables 12-13.</b> ....                                                                                                                                                       | 11 |

**Supplementary Figure 1.** General autoencoder schematic.



General autoencoder structure. The input,  $X$ , is encoded into a multi-dimensional latent space,  $h$ . This “code” is then used to reconstruct the input as accurately as possible at the output layer,  $X'$ .

Supplementary Figure 2. Autoencoder architecture.



Depicted is a summary of the architecture of the convolutional autoencoder using in the current study. The encoder (left) takes 10 seconds of continuous 12-lead ECG waveform data as input to generate a lower dimensional latent space. The decoder (right) takes the latent space as input to reconstruct the 12-lead ECG. Box colors correspond to the following layer types: green = input, cyan = convolution, yellow = activation, teal = pooling, red = reshape, and orange = dense.

**Supplementary Figure 3.** Example of median waveforms generated from an original 12-lead electrocardiogram.



Panel A represents an exemplar original 12-lead tracing, and panel B represents the corresponding median waveform for each lead.

**Supplementary Figure 4.** Latent space representations of age, sex, and body mass index



Figures show uniform manifold approximation and projections (UMAPs) depicting depictions of the ECG latent space stratified by age (left), sex (middle), and body mass index (right). Maps were derived using ECG encodings in latent space of XX.

**Supplementary Figure 5.** Cluster centroids and phenotype vector derivation.



Illustrative example of phenotype vector derivation. The figure shows a two-dimensional t-Distributed Stochastic Neighbor Embedding (t-SNE) scatter plot and demonstrates how sex affects the distribution of electrocardiogram (ECG) encodings in latent space of 1600 UKB participants. ECG encodings from female participants (small pink dots) and male participants (small brown dots) form distinct phenotypic clusters. The larger red and blue dots mark the centroids of these clusters, respectively. The orange arrow represents the phenotype vector for sex.

**Supplementary Figure 6.** Latent space 12-lead electrocardiogram phenome-wide association study perturbation tests.



Panel A represents the results of the phenome-wide association study results in the Massachusetts General Hospital Community Care Cohort Project sample at baseline. Each phecode tested for association is represented as a single point on the plot. The x-axis represents the phenotype category and the y-axis represents the  $-\log_{10}(p\text{-value})$  for the association test. The remaining panels represent the results in which the phecode labels are randomly reclassified with (B) 10%, (C) 20%, and D (100%) reclassification.

**Supplementary Figure 7.** Forest plots demonstrating associations for the top 3 phecodes in each of the datasets for both 12-lead and single-lead ECG latent space PheWAS analyses.



Depicted is a forest plot summarizing the top three strongest Phecode associations with the autoencoder model using 12-lead ECG (top) and single-lead ECG (bottom) in the primary meta-analysis. Points depict study-specific odds ratios (per 1-point increase in vector component score) and error bars 95% confidence intervals.

**Supplementary Figure 8.** Improvements in Phecode discrimination using ECG vector component scores



Plots depict the difference in the area under the receiver operator characteristic curve (AUC) between models with and without the ECG vector component scores, stratified by Phecode category and dataset. Only conditions meeting Bonferroni-corrected phenome-wide significance in the primary meta-analysis ( $p < 3.1 \times 10^{-5}$ ) are included. Multivariable logistic regression models were fit with adjustment for age, sex, race, and vector component score. In the MGH-C3PO and BWH-C3PO datasets, models were further adjusted for ECG acquisition date and zero padding as described in the methods.

**Supplementary Figure 9.** Phenotype vector correlation matrix.



Correlation matrix for phenotype vectors based on the 12-lead electrocardiogram model, organized by disease category. The color scale represents Pearson correlation coefficients.

**Supplementary Figure 10.** Vector component score illustration



Depicted is an illustration of the calculation of vector component scores. Each ECG encoding (“ECG embedding”,  $ECG_i$ ) projects onto each phenotype vector,  $V_p$ . The projected component is calculated from the angle between the ECG encoding and the phenotype vector, scaled by the length of the ECG. Thus, the projected component signifies the latent space position of a single individual along a single phenotype vector and therefore represents a disease-specific “vector component score”.

**Supplementary Tables 1–10.**  
See separate data file.

**Supplementary Table 11.** Top associations by effect size across disease category for incident disease

| <b>Disease grouping*</b>                                                 | <b>N events</b> | <b>Odds ratio (95% CI)</b> | <b>p</b>                |
|--------------------------------------------------------------------------|-----------------|----------------------------|-------------------------|
| <b><i>Circulatory system</i></b>                                         |                 |                            |                         |
| Cardiac defibrillator in situ                                            | 166             | 1.80 (1.65-1.95)           | 3.70x10 <sup>-43</sup>  |
| Right bundle branch block                                                | 468             | 1.77 (1.70-1.84)           | 7.47x10 <sup>-183</sup> |
| Bundle branch block                                                      | 835             | 1.69 (1.63-1.75)           | 4.22x10 <sup>-162</sup> |
| Left bundle branch block                                                 | 409             | 1.64 (1.57-1.72)           | 5.06x10 <sup>-112</sup> |
| Paroxysmal ventricular tachycardia                                       | 495             | 1.61 (1.53-1.70)           | 2.58x10 <sup>-65</sup>  |
| <b><i>Congenital anomalies</i></b>                                       |                 |                            |                         |
| Cardiac congenital anomalies                                             | 1051            | 1.33 (1.28-1.39)           | 1.46x10 <sup>-40</sup>  |
| Cardiac and circulatory congenital anomalies                             | 1307            | 1.32 (1.27-1.38)           | 2.04x10 <sup>-41</sup>  |
| Valvular heart disease/ heart chambers                                   | 285             | 1.27 (1.18-1.38)           | 1.74x10 <sup>-09</sup>  |
| Cardiac shunt/ heart septal defect                                       | 494             | 1.20 (1.13-1.28)           | 2.36x10 <sup>-08</sup>  |
| <b><i>Dermatologic</i></b>                                               |                 |                            |                         |
| Chronic ulcer of leg or foot                                             | 1147            | 1.24 (1.20-1.29)           | 5.41x10 <sup>-37</sup>  |
| Chronic ulcer of unspecified site                                        | 532             | 1.24 (1.17-1.31)           | 1.13x10 <sup>-13</sup>  |
| Decubitus ulcer                                                          | 650             | 1.24 (1.17-1.30)           | 9.49x10 <sup>-15</sup>  |
| Chronic ulcer of skin                                                    | 1856            | 1.24 (1.20-1.27)           | 1.95x10 <sup>-49</sup>  |
| Cellulitis and abscess of trunk                                          | 804             | 1.17 (1.12-1.22)           | 3.22x10 <sup>-12</sup>  |
| <b><i>Digestive</i></b>                                                  |                 |                            |                         |
| Hemorrhage from gastrointestinal ulcer                                   | 319             | 1.34 (1.22-1.47)           | 7.84x10 <sup>-10</sup>  |
| Portal hypertension                                                      | 123             | 1.31 (1.18-1.46)           | 8.84x10 <sup>-07</sup>  |
| Gastric ulcer                                                            | 470             | 1.29 (1.20-1.38)           | 1.50x10 <sup>-11</sup>  |
| Liver abscess and sequelae of chronic liver disease                      | 267             | 1.28 (1.19-1.38)           | 9.40x10 <sup>-11</sup>  |
| Splenomegaly                                                             | 398             | 1.25 (1.18-1.31)           | 4.99x10 <sup>-16</sup>  |
| <b><i>Endocrine/Metabolic</i></b>                                        |                 |                            |                         |
| Cachexia                                                                 | 253             | 1.40 (1.27-1.54)           | 1.43x10 <sup>-11</sup>  |
| Dysmetabolic syndrome X                                                  | 367             | 1.37 (1.27-1.47)           | 7.44x10 <sup>-18</sup>  |
| Other disorders of pancreatic internal secretion                         | 341             | 1.35 (1.25-1.46)           | 2.42x10 <sup>-13</sup>  |
| Disorders of magnesium metabolism                                        | 747             | 1.34 (1.27-1.41)           | 2.26x10 <sup>-28</sup>  |
| Acid-base balance disorder                                               | 1320            | 1.33 (1.29-1.38)           | 1.26x10 <sup>-60</sup>  |
| <b><i>Genitourinary</i></b>                                              |                 |                            |                         |
| Renal dialysis                                                           | 613             | 1.33 (1.27-1.39)           | 1.04x10 <sup>-35</sup>  |
| End stage renal disease                                                  | 363             | 1.31 (1.23-1.40)           | 8.49x10 <sup>-18</sup>  |
| Nephritis and nephropathy in diseases classified elsewhere               | 184             | 1.31 (1.21-1.42)           | 4.25x10 <sup>-11</sup>  |
| Acute renal failure                                                      | 2959            | 1.29 (1.26-1.31)           | 2.71x10 <sup>-119</sup> |
| Chronic Kidney Disease, Stage III                                        | 1621            | 1.26 (1.22-1.30)           | 1.00x10 <sup>-40</sup>  |
| <b><i>Hematopoietic</i></b>                                              |                 |                            |                         |
| Anemia in chronic kidney disease                                         | 453             | 1.26 (1.19-1.33)           | 1.07x10 <sup>-15</sup>  |
| Acute posthemorrhagic anemia                                             | 1306            | 1.25 (1.21-1.30)           | 4.48x10 <sup>-34</sup>  |
| Hemorrhagic disorder due to intrinsic circulating anticoagulants         | 170             | 1.25 (1.14-1.37)           | 3.74x10 <sup>-06</sup>  |
| Secondary thrombocytopenia                                               | 547             | 1.24 (1.17-1.31)           | 1.40x10 <sup>-14</sup>  |
| Encounter for long-term (current) use of anticoagulants                  | 2661            | 1.24 (1.21-1.27)           | 7.91x10 <sup>-63</sup>  |
| <b><i>Infectious diseases</i></b>                                        |                 |                            |                         |
| Septicemia                                                               | 1848            | 1.31 (1.28-1.35)           | 5.20x10 <sup>-78</sup>  |
| Bacteremia                                                               | 905             | 1.27 (1.22-1.33)           | 3.17x10 <sup>-28</sup>  |
| Infection/inflammation of internal prosthetic device; implant; and graft | 601             | 1.26 (1.20-1.32)           | 1.34x10 <sup>-20</sup>  |
| Gram positive septicemia                                                 | 173             | 1.26 (1.14-1.39)           | 5.80x10 <sup>-06</sup>  |
| Methicillin resistant Staphylococcus aureus                              | 340             | 1.24 (1.14-1.35)           | 3.60x10 <sup>-07</sup>  |
| <b><i>Injuries and poisonings</i></b>                                    |                 |                            |                         |

|                                                                                                                                                                                                                   |      |                  |                         |
|-------------------------------------------------------------------------------------------------------------------------------------------------------------------------------------------------------------------|------|------------------|-------------------------|
| Non-healing surgical wound                                                                                                                                                                                        | 181  | 1.34 (1.22-1.48) | 5.08x10 <sup>-09</sup>  |
| Traumatic amputation                                                                                                                                                                                              | 124  | 1.33 (1.17-1.52) | 2.19x10 <sup>-05</sup>  |
| Certain early complications of trauma or procedure                                                                                                                                                                | 463  | 1.31 (1.22-1.40) | 2.84x10 <sup>-15</sup>  |
| Septic shock                                                                                                                                                                                                      | 561  | 1.30 (1.23-1.37) | 2.82x10 <sup>-23</sup>  |
| Sepsis                                                                                                                                                                                                            | 1452 | 1.30 (1.25-1.34) | 1.37x10 <sup>-56</sup>  |
| <b><i>Mental disorders</i></b>                                                                                                                                                                                    |      |                  |                         |
| Delirium due to conditions classified elsewhere                                                                                                                                                                   | 1193 | 1.26 (1.22-1.31) | 7.90x10 <sup>-37</sup>  |
| Altered mental status                                                                                                                                                                                             | 2465 | 1.24 (1.21-1.27) | 5.92x10 <sup>-53</sup>  |
| Alcoholic liver damage                                                                                                                                                                                            | 176  | 1.23 (1.13-1.34) | 3.81x10 <sup>-06</sup>  |
| Psychosis                                                                                                                                                                                                         | 540  | 1.22 (1.15-1.29) | 1.70x10 <sup>-12</sup>  |
| Alteration of consciousness                                                                                                                                                                                       | 1357 | 1.18 (1.14-1.23) | 4.87x10 <sup>-19</sup>  |
| <b><i>Musculoskeletal</i></b>                                                                                                                                                                                     |      |                  |                         |
| Acute osteomyelitis                                                                                                                                                                                               | 209  | 1.30 (1.20-1.41) | 6.41x10 <sup>-11</sup>  |
| Unspecified osteomyelitis                                                                                                                                                                                         | 349  | 1.28 (1.21-1.35) | 9.71x10 <sup>-18</sup>  |
| Osteomyelitis                                                                                                                                                                                                     | 446  | 1.26 (1.20-1.33) | 2.50x10 <sup>-18</sup>  |
| Chronic osteomyelitis                                                                                                                                                                                             | 177  | 1.24 (1.13-1.37) | 5.86x10 <sup>-06</sup>  |
| Osteomyelitis, periostitis, and other infections involving bone                                                                                                                                                   | 474  | 1.24 (1.18-1.3)  | 6.46x10 <sup>-17</sup>  |
| <b><i>Neoplasms</i></b>                                                                                                                                                                                           |      |                  |                         |
| Cancer of connective tissue                                                                                                                                                                                       | 240  | 1.23 (1.12-1.34) | 8.73x10 <sup>-06</sup>  |
| Cancer of bone and connective tissue                                                                                                                                                                              | 388  | 1.18 (1.11-1.26) | 1.36x10 <sup>-07</sup>  |
| Cancer within the respiratory system                                                                                                                                                                              | 1045 | 1.17 (1.12-1.23) | 4.84x10 <sup>-13</sup>  |
| Cancer of bronchus; lung                                                                                                                                                                                          | 961  | 1.17 (1.12-1.22) | 4.32x10 <sup>-13</sup>  |
| Secondary malignant neoplasm of liver                                                                                                                                                                             | 374  | 1.17 (1.10-1.24) | 6.45x10 <sup>-07</sup>  |
| <b><i>Neurological</i></b>                                                                                                                                                                                        |      |                  |                         |
| Encephalopathy, not elsewhere classified                                                                                                                                                                          | 754  | 1.24 (1.18-1.31) | 8.10x10 <sup>-16</sup>  |
| Chronic pain syndrome                                                                                                                                                                                             | 662  | 1.20 (1.13-1.27) | 1.25x10 <sup>-09</sup>  |
| Convulsions                                                                                                                                                                                                       | 1054 | 1.16 (1.12-1.21) | 1.04x10 <sup>-13</sup>  |
| Epilepsy, recurrent seizures, convulsions                                                                                                                                                                         | 1207 | 1.15 (1.11-1.20) | 2.37x10 <sup>-14</sup>  |
| Other conditions of brain                                                                                                                                                                                         | 1712 | 1.15 (1.11-1.19) | 3.71x10 <sup>-16</sup>  |
| <b><i>Respiratory</i></b>                                                                                                                                                                                         |      |                  |                         |
| Pseudomonal pneumonia                                                                                                                                                                                             | 103  | 1.62 (1.43-1.84) | 2.79x10 <sup>-14</sup>  |
| Pulmonary congestion and hypostasis                                                                                                                                                                               | 1958 | 1.35 (1.31-1.39) | 5.26x10 <sup>-107</sup> |
| Respiratory failure                                                                                                                                                                                               | 1134 | 1.35 (1.30-1.40) | 2.16x10 <sup>-52</sup>  |
| Emphysema                                                                                                                                                                                                         | 759  | 1.32 (1.25-1.39) | 8.90x10 <sup>-26</sup>  |
| Pneumonitis due to inhalation of food or vomitus                                                                                                                                                                  | 692  | 1.31 (1.25-1.37) | 2.57x10 <sup>-28</sup>  |
| <b><i>Sense organs</i></b>                                                                                                                                                                                        |      |                  |                         |
| Other nondiabetic retinopathy                                                                                                                                                                                     | 282  | 1.18 (1.10-1.27) | 3.52x10 <sup>-06</sup>  |
| Blindness and low vision                                                                                                                                                                                          | 769  | 1.11 (1.06-1.17) | 3.52x10 <sup>-05</sup>  |
| Presbyopia                                                                                                                                                                                                        | 1118 | 1.07 (1.04-1.10) | 1.41x10 <sup>-06</sup>  |
| Dry eyes                                                                                                                                                                                                          | 1579 | 1.06 (1.03-1.09) | 3.18x10 <sup>-05</sup>  |
| Senile cataract                                                                                                                                                                                                   | 3649 | 1.05 (1.03-1.07) | 5.34x10 <sup>-10</sup>  |
| <b><i>Symptoms</i></b>                                                                                                                                                                                            |      |                  |                         |
| Cardiogenic shock                                                                                                                                                                                                 | 313  | 1.45 (1.34-1.56) | 1.31x10 <sup>-22</sup>  |
| Shock                                                                                                                                                                                                             | 747  | 1.38 (1.32-1.44) | 2.71x10 <sup>-44</sup>  |
| Gangrene                                                                                                                                                                                                          | 209  | 1.37 (1.25-1.50) | 5.46x10 <sup>-12</sup>  |
| Debility unspecified                                                                                                                                                                                              | 223  | 1.28 (1.15-1.43) | 4.77x10 <sup>-06</sup>  |
| Nonspecific abnormal findings on radiological and other examination of other intrathoracic organs (echocardiogram, etc)                                                                                           | 1632 | 1.14 (1.10-1.18) | 1.41x10 <sup>-13</sup>  |
| *Displayed are significant associations with the top 5 largest effect sizes within each disease category. In cases where there are fewer than 5 significant associations, all significant associations are shown. |      |                  |                         |

**Supplementary Tables 12–13.**  
See separate data file.
